# Supplementary material for: Rumen Fermentation and Microbiome Responses to Enzymatic Hydrolysate of Cottonseed Protein Supplementation in Continuous In Vitro Culture
Source: MDPI journal article supplement (doi:10.3390/ani12162113), 2022-08-18
Supplement: s1 [file s1]

Table S1 The sequencing data information of bacteria

| Samples No. | Raw reads | Effective reads | Effective rate (%) | OTU counts | Q30(%) |
|-------------|-----------|-----------------|--------------------|------------|--------|
| CON_1       | 34376     | 29985           | 87.23              | 1785       | 94.29  |
| CON_2       | 39009     | 33847           | 86.77              | 1777       | 93.79  |
| CON_3       | 38234     | 34750           | 90.89              | 1733       | 93.22  |
| XP_1        | 40647     | 37943           | 93.35              | 1786       | 94.76  |
| XP_2        | 31771     | 29280           | 92.16              | 2298       | 94.50  |
| XP_3        | 34642     | 31148           | 89.91              | 2468       | 94.57  |
| ECP1_1      | 34120     | 29498           | 86.45              | 1736       | 93.51  |
| ECP1_2      | 41640     | 38170           | 91.67              | 2618       | 94.39  |
| ECP1_3      | 33315     | 30407           | 91.27              | 2673       | 94.53  |
| ECP2_1      | 36800     | 33959           | 92.28              | 1800       | 93.85  |
| ECP2_2      | 34958     | 31610           | 90.42              | 1711       | 93.27  |
| ECP2_3      | 38814     | 35912           | 92.52              | 1772       | 93.18  |
| ECP3_1      | 40125     | 37203           | 92.72              | 1808       | 95.00  |
| ECP3_2      | 41036     | 37797           | 92.11              | 1776       | 94.46  |
| ECP3_3      | 34072     | 31408           | 92.18              | 1834       | 93.72  |

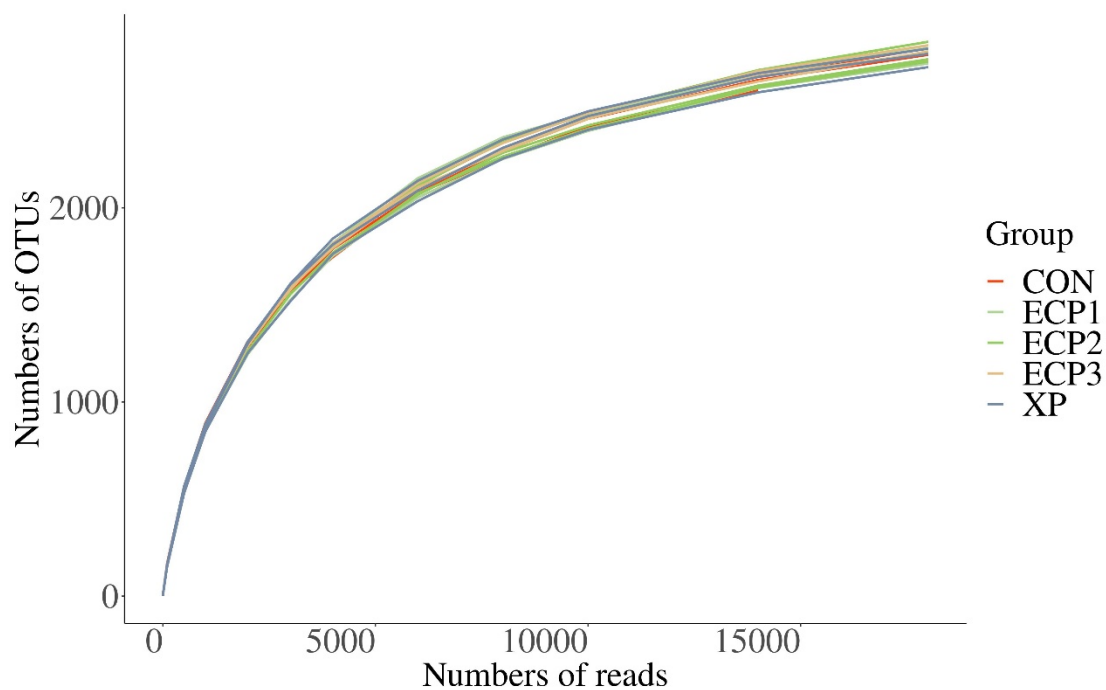

Figure S1. Multy samples Rarefaction Curves
